# Supplementary material
Source: PubMed Central journal article supplement (PMC1698676)
Supplement: bj4010287add.pdf [file bj4010287add.pdf]

## Supplementary Materials

**Table S1: Primers used for mutagenesis.** The positions of the mutated nucleotides are marked with bold letters.

|                          | <b>Primer Pair</b> | <b>Sequence</b>                                       |
|--------------------------|--------------------|-------------------------------------------------------|
| CYP20-3 <sub>WT</sub>    | CYP20-3WT-F        | 5'-tccatggctgctgaggaagaa-3'                           |
|                          | CYP20-3WT-R        | 5'-tcaagcatctaacgggagtc-3'                            |
| CYP20-3 <sub>C54S</sub>  | CYP20-3C54S-F      | 5'-cgtgcctt <b>gtct</b> actggtgag-3'                  |
|                          | CYP20-3C54S-R      | 5'-ctcaccagt <b>agaca</b> aggcacg-3'                  |
| CYP20-3 <sub>C129S</sub> | CYP20-3C129S-F     | 5'-gccagttttcatt <b>tct</b> accgtcaagac-3'            |
|                          | CYP20-3C129S-R     | 5'-gtcttgacggt <b>agaa</b> atgaaaaactggc-3'           |
| CYP20-3 <sub>C171S</sub> | CYP20-3C171S-F     | 5'-ccaagaaaggt <b>tct</b> agaatctatgcc-3'             |
|                          | CYP20-3C171S-R     | 5'-ggcatagatt <b>ctaga</b> acctttcttggg-3'            |
| CYP20-3 <sub>C176S</sub> | CYP20-3C176S-F     | 5'-atctatgcct <b>ccg</b> gagagctcccgttaatgcttga-3'    |
|                          | CYP20-3C176S-R     | 5'-gagctctcc <b>ggag</b> gcatagat-3'                  |
| CYP20-3 <sub>ΔPPI</sub>  | CYP20-3ΔPPI-F      | 5'-ccat <b>gct</b> attaaggatt <b>tgat</b> gatcc-3'    |
|                          | CYP20-3ΔPPI-R      | 5'-ggatcat <b>caa</b> atccttaataat <b>agc</b> atgg-3' |
